# Supplementary material
Source: publisher figshare collection journal article supplement (https://acs.figshare.com/ndownloader/files/4193446)
Supplement: Supplementary file 1 [file 4193446]

## SUPPLEMENTAL FIGURES

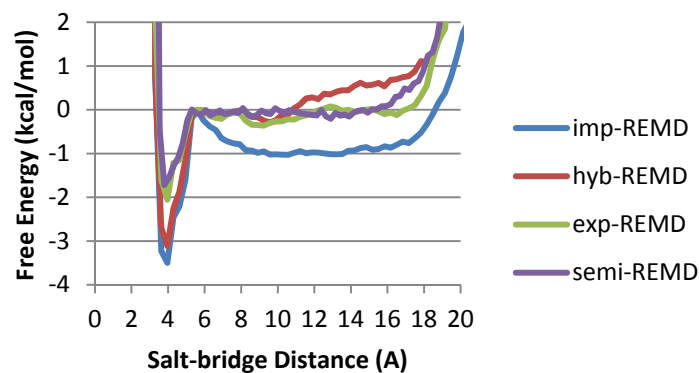

**Supplemental Figure 1.** PMF at 298 K with respect to salt-bridge distance for the implicit, hybrid, explicit methods compared with a ‘semi-hybrid’ approach that includes the 200 nearest water molecules during replica exchanges.

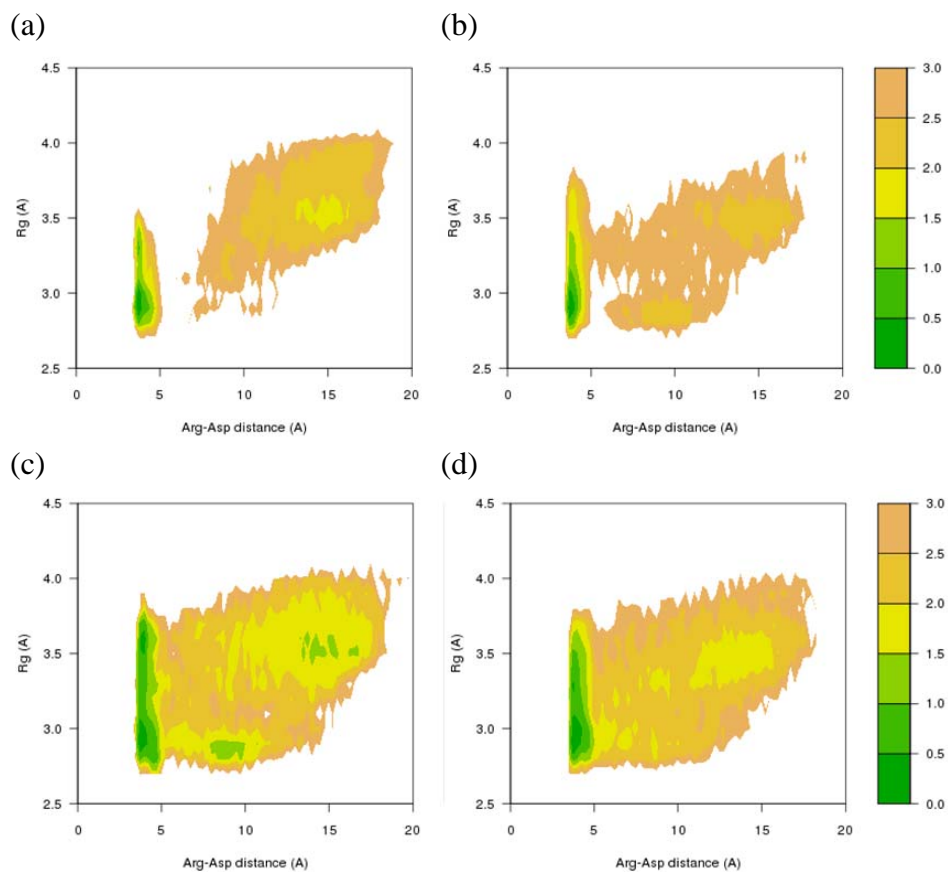

**Supplemental Figure 2.** 2D PMF at 298 K with respect to salt-bridge distance and radius of gyration for the (a) implicit, (b) hybrid, (c) explicit methods compared with a (d) ‘semi-hybrid’ approach that includes the 200 nearest water molecules during replica exchanges.
